# Supplementary material for: Extracellular Vesicles from Fusarium graminearum Contain Protein Effectors Expressed during Infection of Corn
Source: MDPI journal article supplement (doi:10.3390/jof7110977), 2021-11-17
Supplement: s1 [file s1]

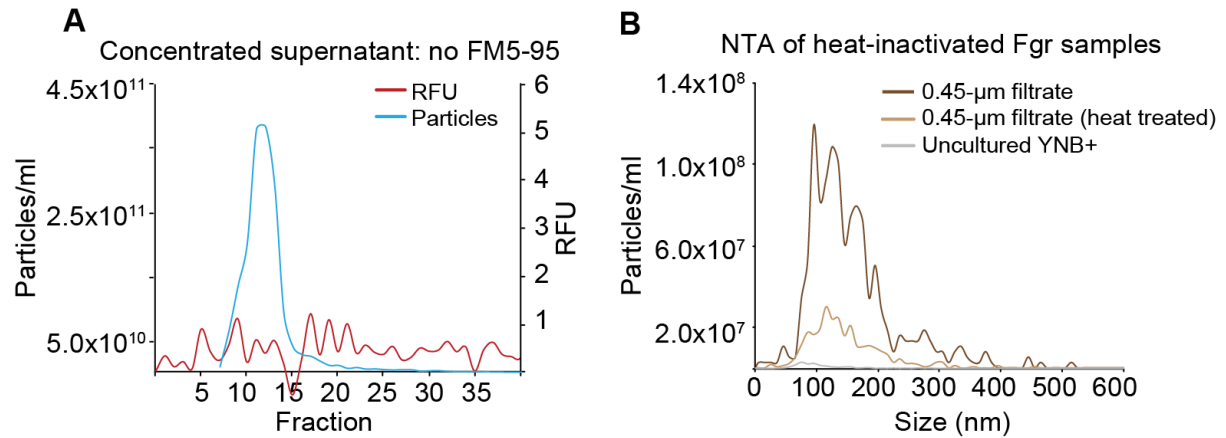

**Supplementary Figure S 1. Controls for the separation of EVs from *Fusarium graminearum* (Fgr) by SEC.** (A) An Fgr culture was processed for EV separation and mixed with DPBS instead of FM5-95 before SEC. Fluorescence of all fractions was recorded (red line) and their particle number determined by NTA (blue line) (n=1). (B) Fgr was grown for 5 d, then the mycelia were heat-treated before being transferred to fresh medium that was incubated for 5 d. NTA detected  $4.1 \times 10^{10}$  particles/L in the 0.45-µm filtrate of the heat-treated Fgr culture,  $4.8 \times 10^{10}$  particles/L in the untreated 0.45 µm filtrate, and  $1.9 \times 10^{10}$  particles/L in the sterile YNB+ (n=1).





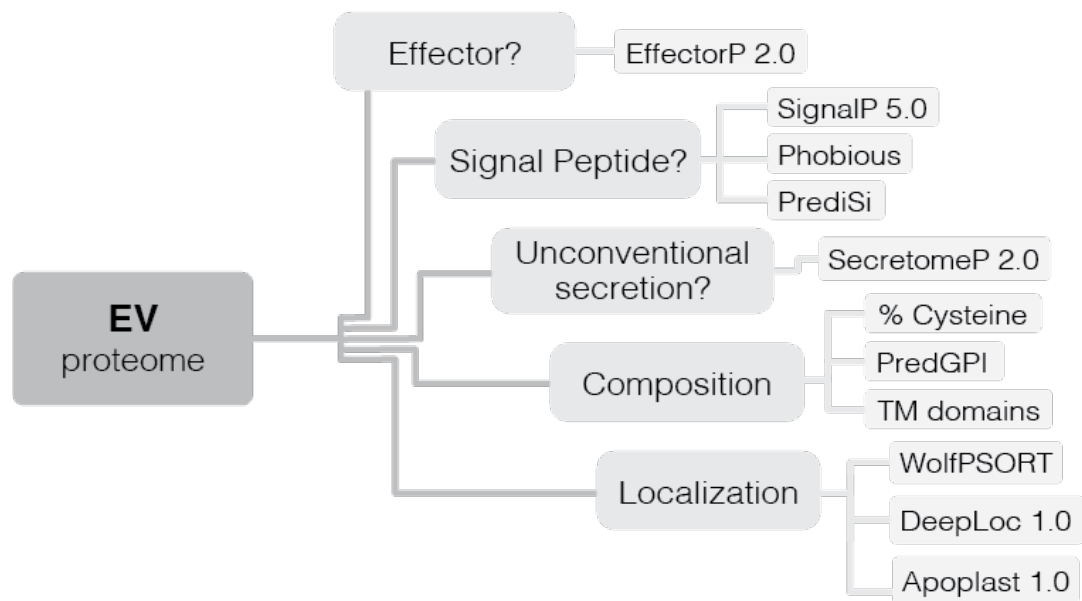

**Supplementary Figure S4. Computational prediction of effector candidates detected in EV samples from *Fusarium graminearum* (Fgr).** LFQ-based proteomics revealed 647 proteins in the EV samples from *Fgr*. All proteins were processed with EffectorP 2.0 to predict effector activity, PrediSi, Uniprot annotation, SignalP 5, and Phobius to predict signal peptide (SP), SecretomeP 2.0 to predict unconventional secretion, PredGPI to detect GPI anchoring, ApoplastP 1.0, WolfPSORT, and DeepLoc 1.0 to predict cellular location (ex: extracellular, cyt: cytoplasmic, mito: mitochondrial, nucl: nuclear). The percentage cysteine sequence content was calculated manually. Housekeeping, ribosomal and transmembrane (TM) proteins were omitted.
